# Supplementary material for: Energy gradient architectured praseodymium chalcogenide quantum dot solar cells: towards unidirectionally funneling energy transfer
Source: Royal Society of Chemistry journal article supplement (doi:10.1039/c5ta06447c), 2015-01-01
Supplement: c5ta06447c1.pdf [file c5ta06447c1.pdf]

Electronic Supplementary Information

**Energy gradient architected praseodymium chalcogenide  
quantum dot solar cells: Towards unidirectionally funneling energy  
transfer**

Xiao Jin<sup>a,§</sup>, Weifu Sun<sup>b,§</sup>, Shenglian Luo<sup>a,\*</sup>, Liping Shao<sup>a</sup>, Jian Zhang<sup>a</sup>, Xubiao Luo<sup>a</sup>, Taihuei  
Wei<sup>c</sup>, Yuancheng Qin<sup>a</sup>, Yinglin Song<sup>d,\*</sup>, Qinghua Li<sup>a,\*</sup>

<sup>a</sup>Key Laboratory of Jiangxi Province for Persistent Pollutants Control and Resources Recycle,  
Nanchang Hangkong University, Nanchang 330063, PR China

<sup>b</sup>School of Aerospace, Mechanical and Mechatronic Engineering, The University of Sydney,  
New South Wales 2006, Australia

<sup>c</sup>Department of Physics, National Chung-Cheng University, Chia-Yi 621, Taiwan, Republic of  
China

<sup>d</sup>Department of Physics, Harbin Institute of Technology, Harbin 150001, PR China

<sup>§</sup>These authors contributed equally to this work.

\*e-mail: qhli@hqu.edu.cn; shenglianluo@163.com; ylsong@hit.edu.cn

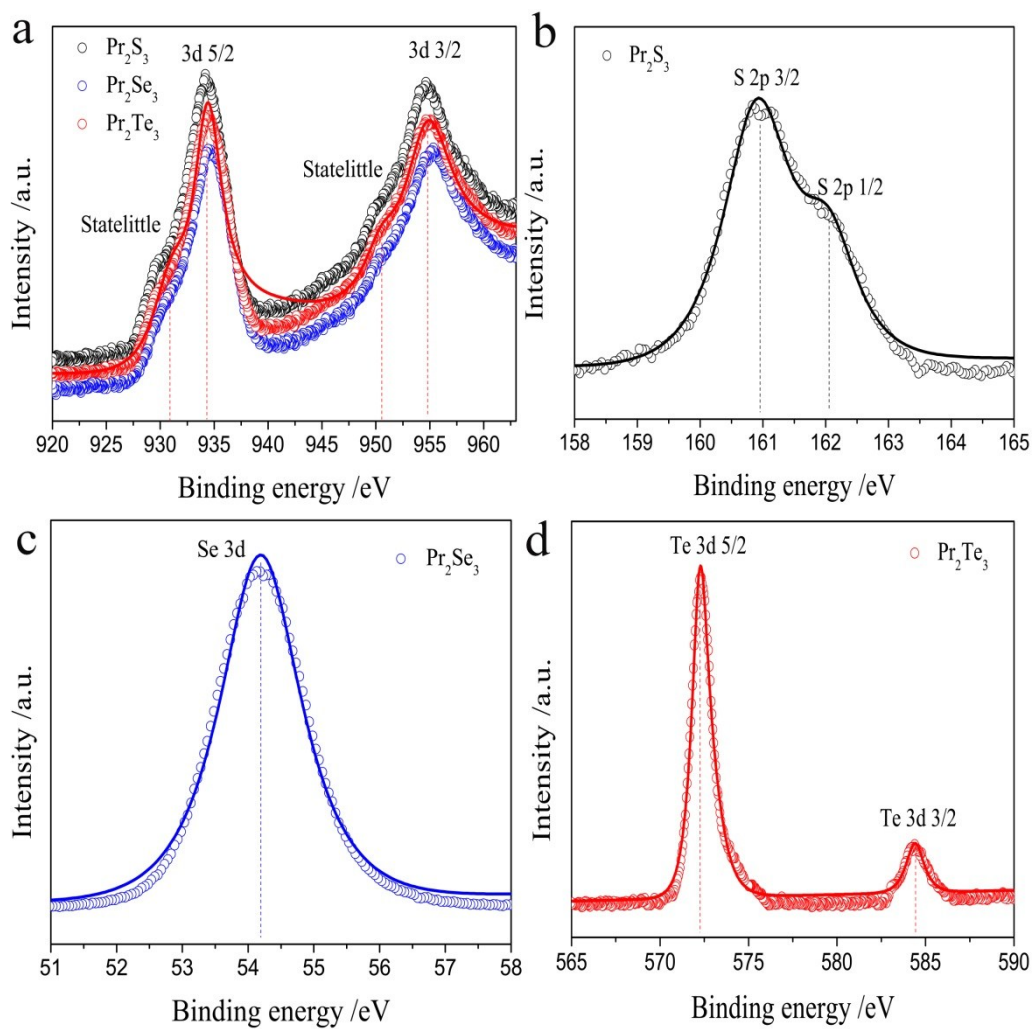

**Fig. S1** XPS spectra of Pr 3d for  $\text{Pr}_2(\text{S}, \text{Se}, \text{Te})_3$  QDs (a), XPS spectra of S 3d for  $\text{Pr}_2\text{S}_3$  QDs (b), Se 3d for  $\text{Pr}_2\text{Se}_3$  QDs (c) and Te 3d for  $\text{Pr}_2\text{Te}_3$  QDs (d).

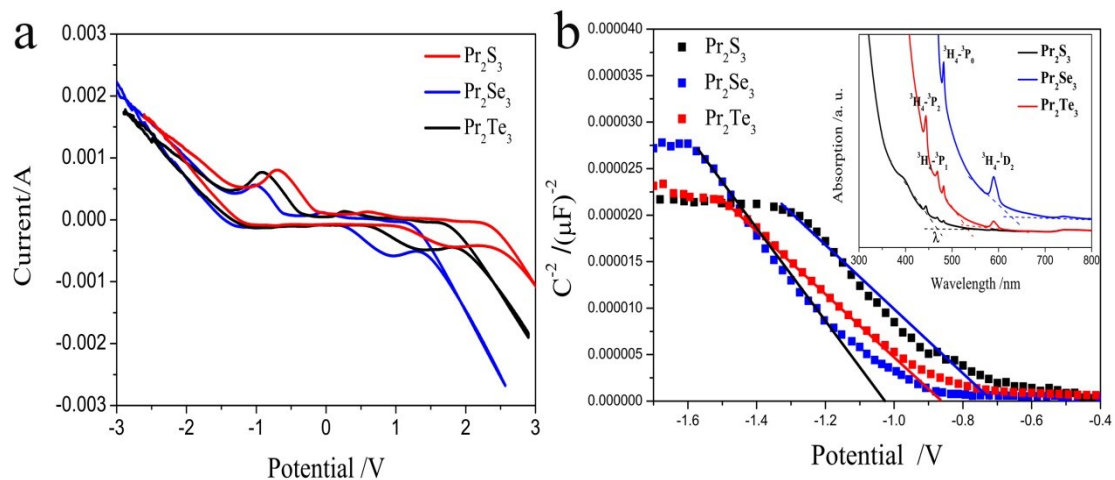

**Fig. S2** (a) The CV characteristics of the QD films in acetonitrile containing 0.1 M tetramethylammonium perchlorate in dimethylformamide at a sweep rate of 50 mV s<sup>-1</sup>; (b) Mott-Schottky plots of the different QD films at 1 kHz in 0.05 M Na<sub>2</sub>SO<sub>4</sub> aqueous solution and the insert highlights the UV-vis absorption spectra of the three films.

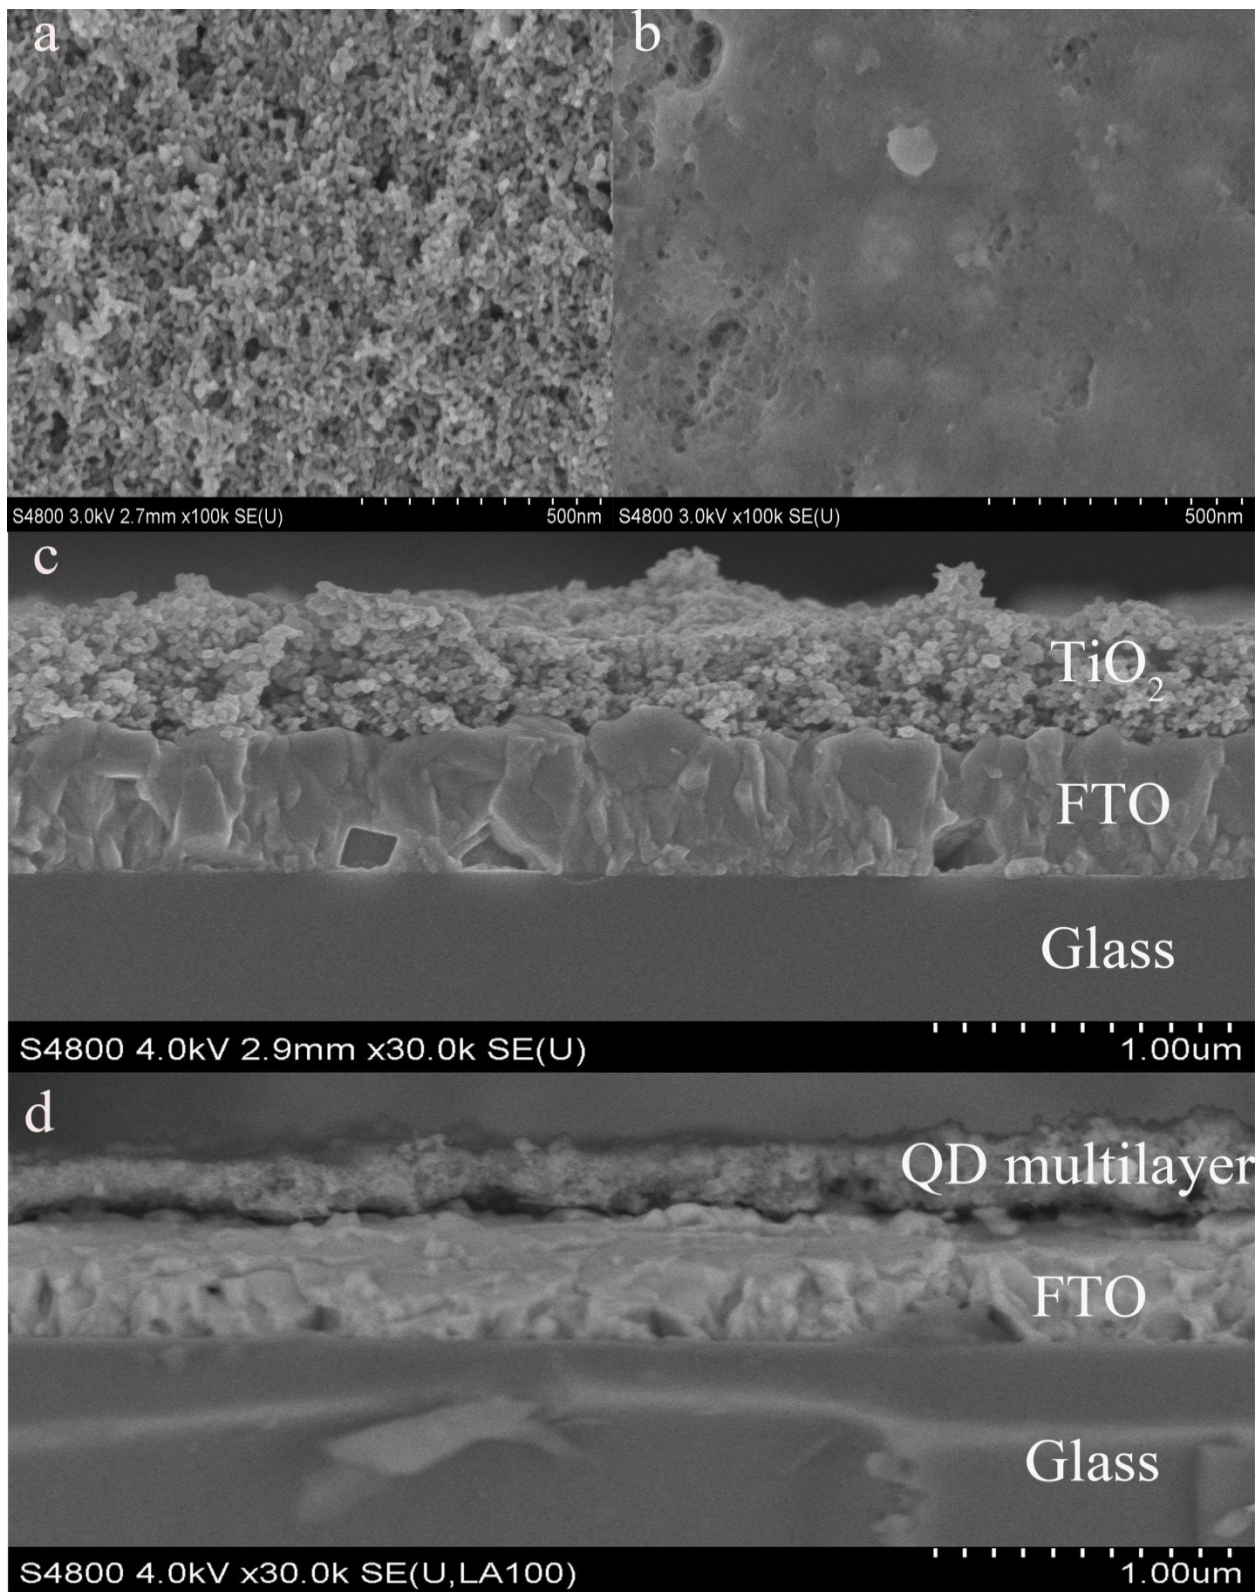

**Fig. S3** SEM images of the bare TiO<sub>2</sub> (a) and Pr<sub>2</sub>Se<sub>3</sub>/Pr<sub>2</sub>Te<sub>3</sub>/Pr<sub>2</sub>S<sub>3</sub>/TiO<sub>2</sub> films, cross-sectional SEM images of TiO<sub>2</sub> (c) and the QD multilayers (d).

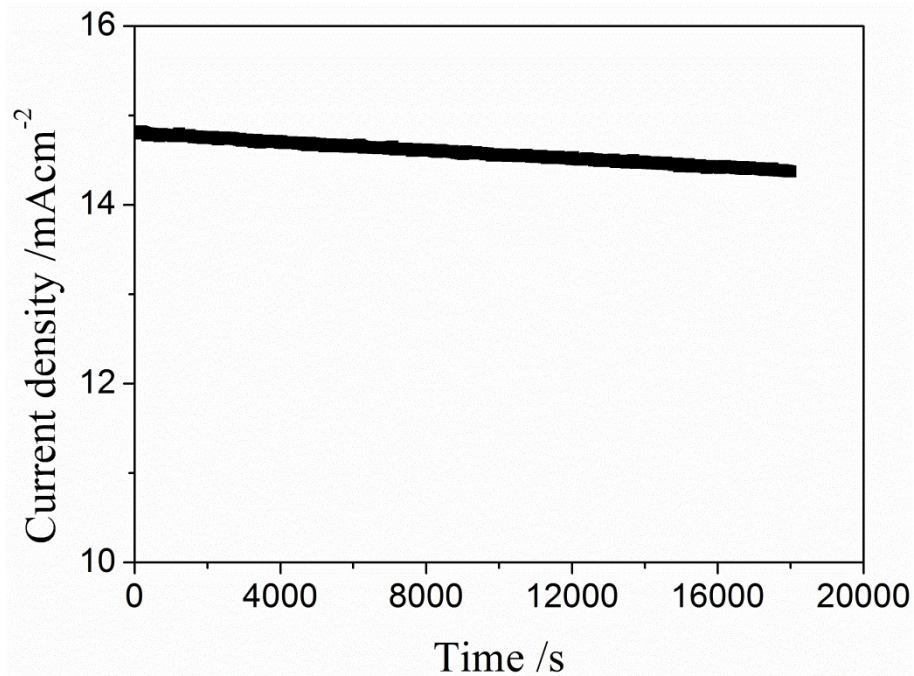

**Fig. S4.** Photocurrent density of the assembled  $\text{Pr}_2\text{Se}_3/\text{Pr}_2\text{Te}_3/\text{Pr}_2\text{S}_3/\text{TiO}_2$  quadruple-stack QDSC was recorded with irradiation over 5 h under prolonged irradiation of  $100 \text{ mWcm}^{-2}$ .

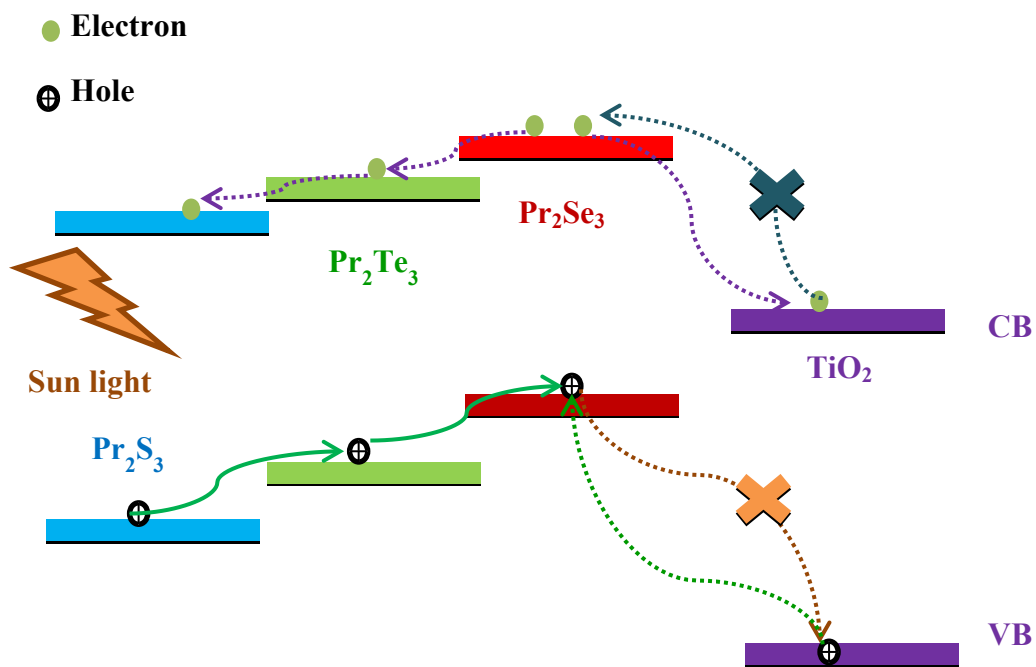

**Fig. S5.** Energy band diagram of the  $\text{Pr}_2\text{S}_3/\text{Pr}_2\text{Te}_3/\text{Pr}_2\text{Se}_3/\text{TiO}_2$  heterojunction and the schematic diagram displaying charge transfer for photogeneration in the QDs.



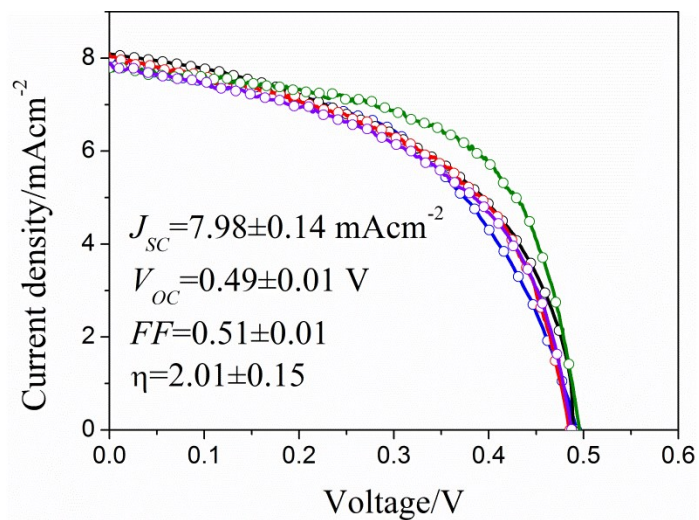

**Fig. S6.**  $J$ - $V$  characteristics of  $\text{Pr}_2\text{S}_3/\text{Pr}_2\text{Te}_3/\text{Pr}_2\text{Se}_3/\text{TiO}_2$  QDSC under AM1.5G solar simulated illumination.

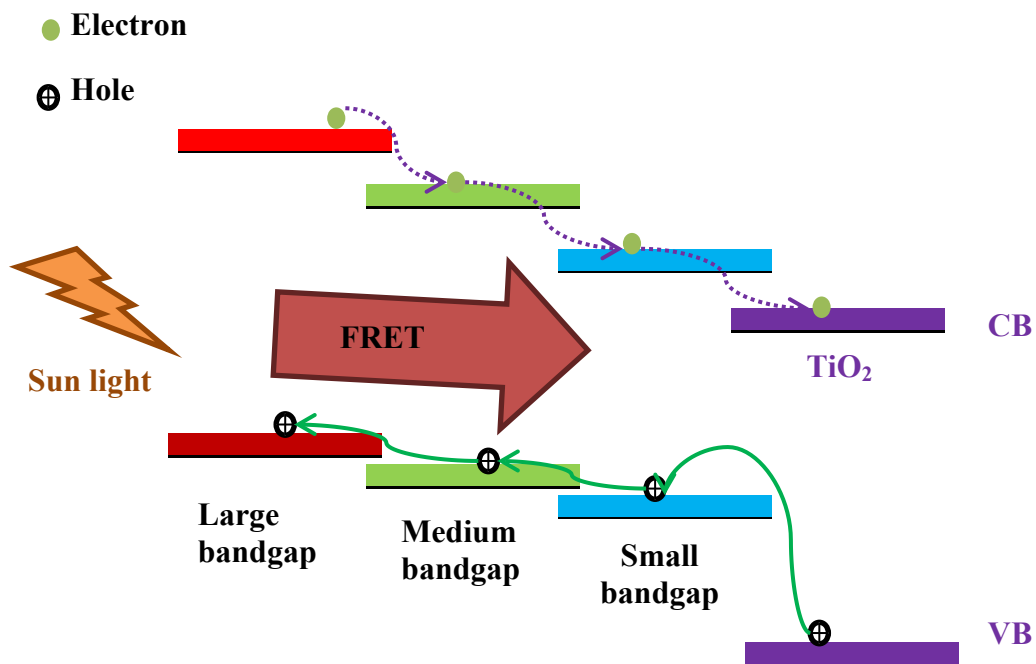

**Fig. S7.** The schematic diagram of an ideal multilayer displaying the energy levels, charge transfer, and FRET.

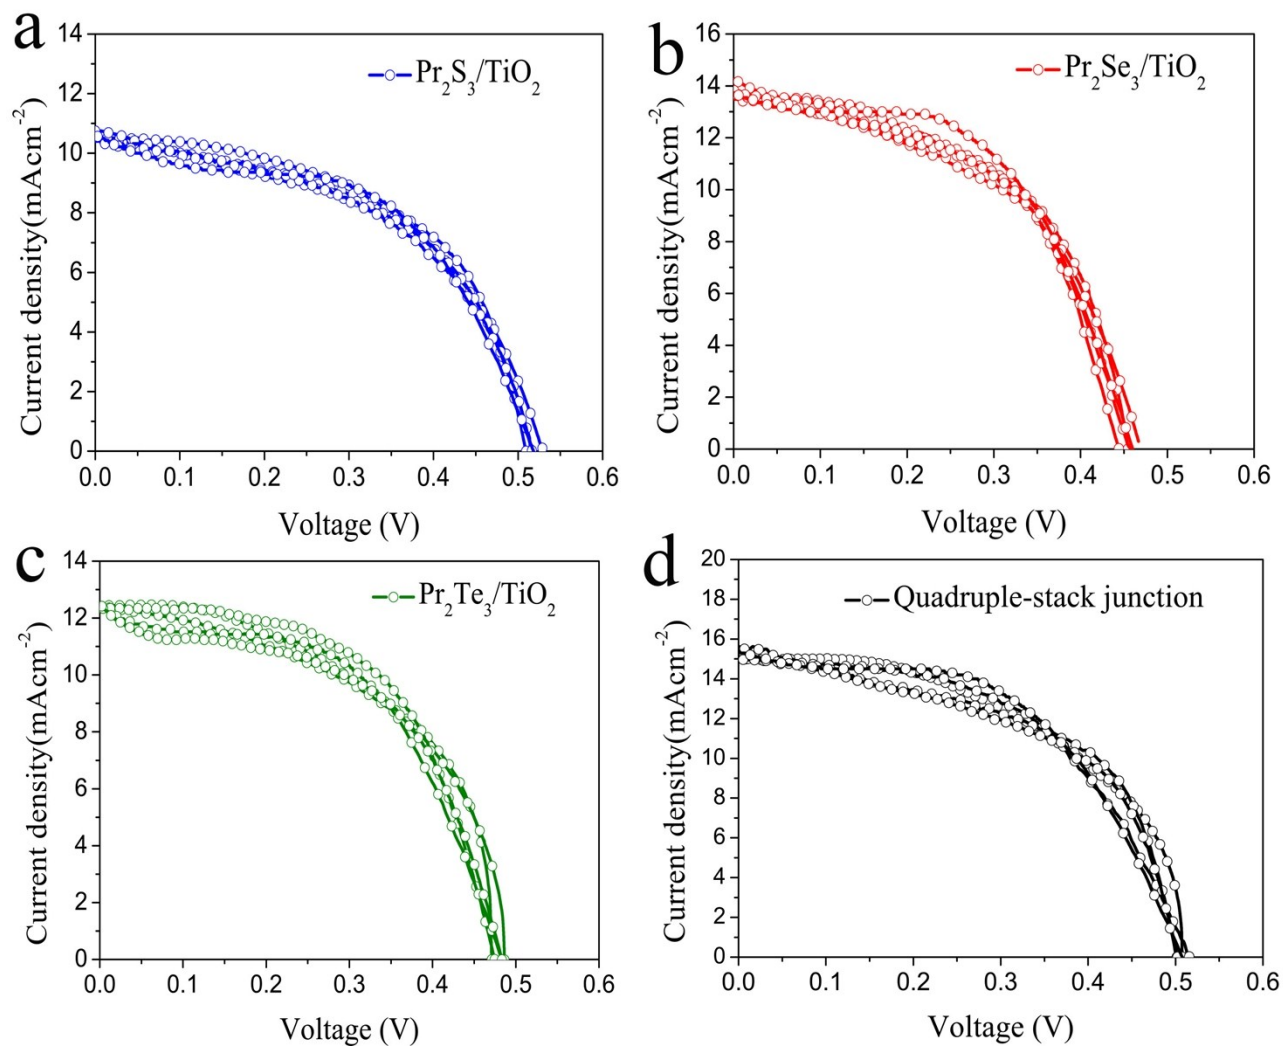

**Fig. S8.**  $J$ - $V$  characteristics of  $\text{Pr}_2\text{S}_3/\text{TiO}_2$  (a)  $\text{Pr}_2\text{Se}_3/\text{TiO}_2$  (b)  $\text{Pr}_2\text{Te}_3/\text{TiO}_2$  and  $\text{Pr}_2\text{Se}_3/\text{Pr}_2\text{Te}_3/\text{Pr}_2\text{S}_3/\text{TiO}_2$  QDSCs in AM1.5G solar simulated light.
